# Supplementary figures and images for: gp96 Expression in Gliomas and Its Association with Tumor Malignancy and T Cell Infiltrating Level
Source: Hindawi journal article supplement (doi:10.1155/2022/9575867), 2022-06-26

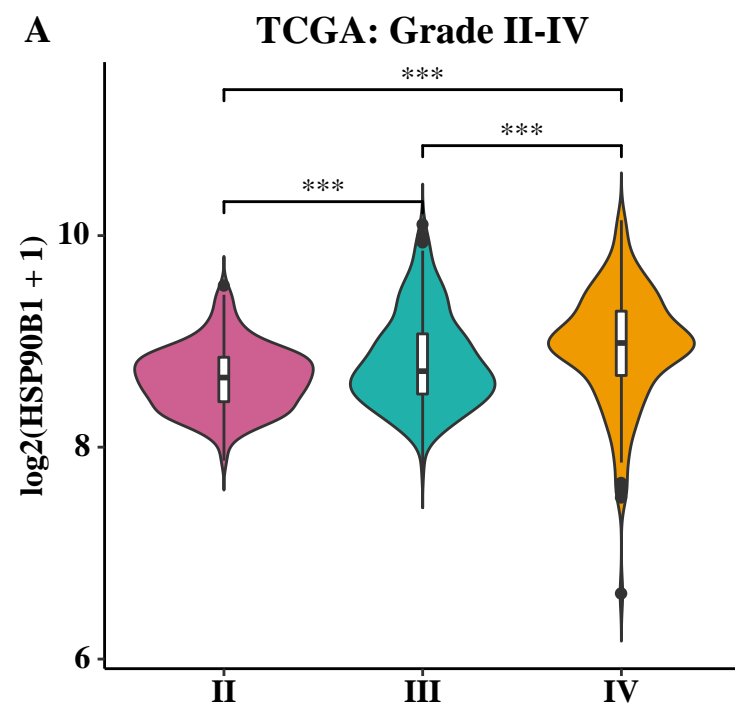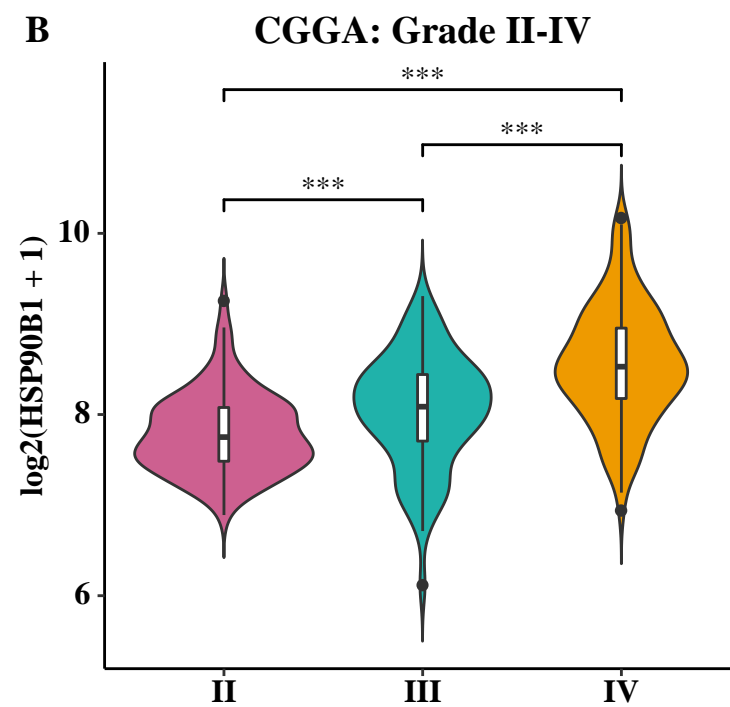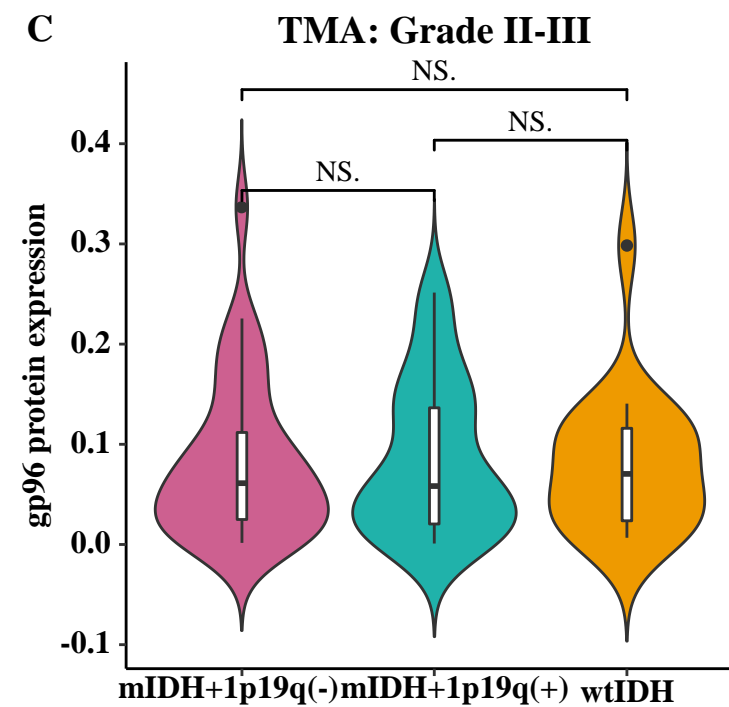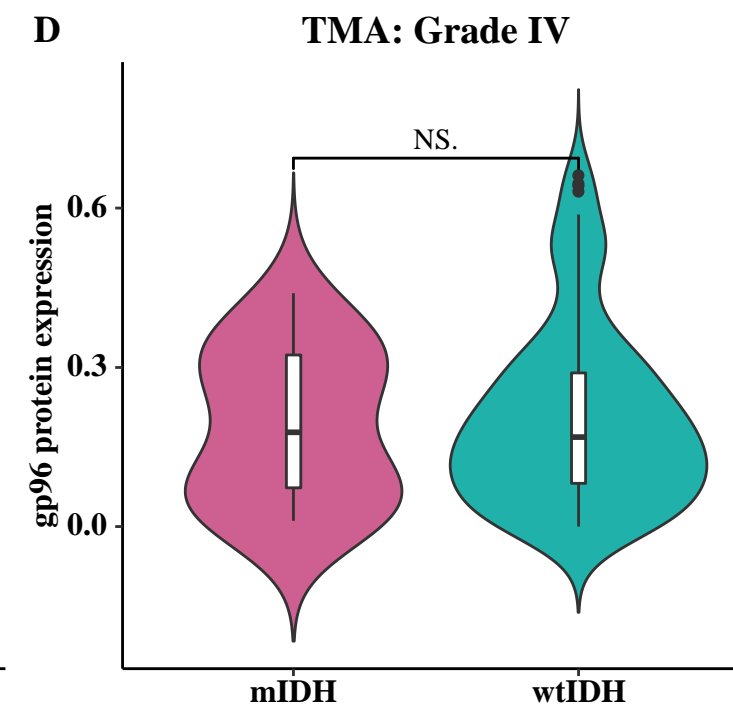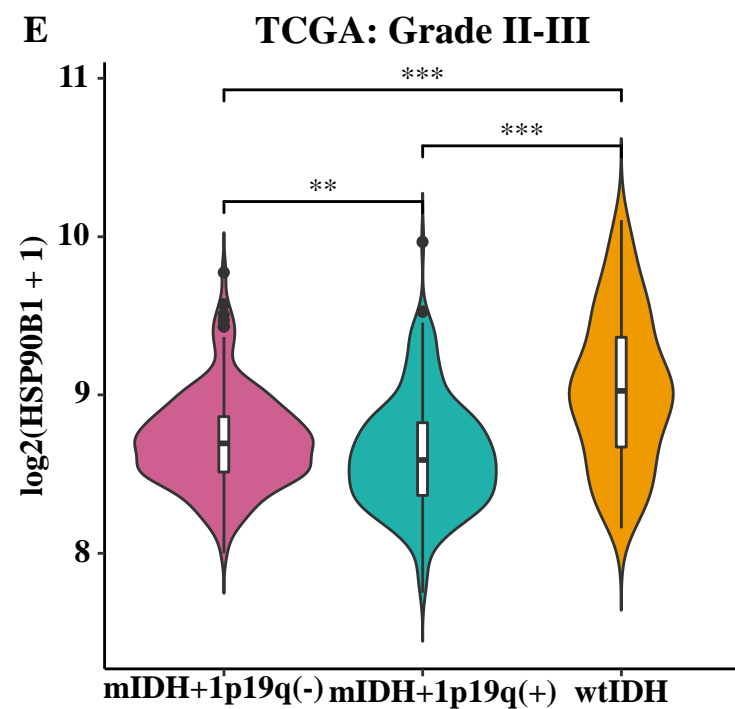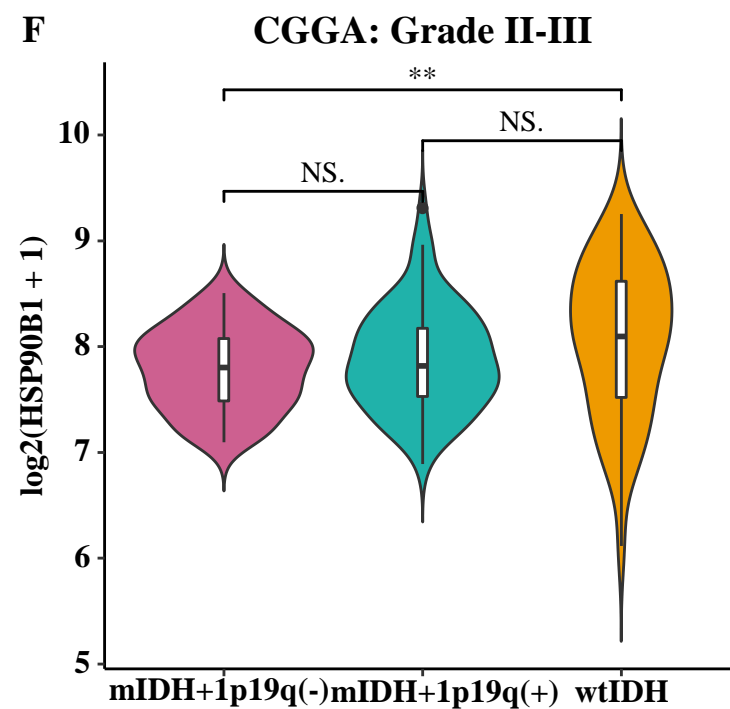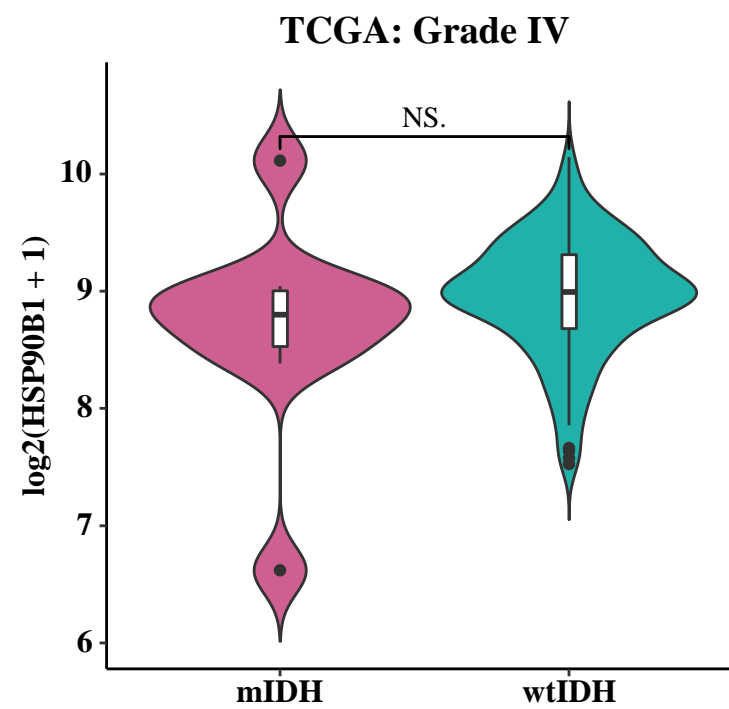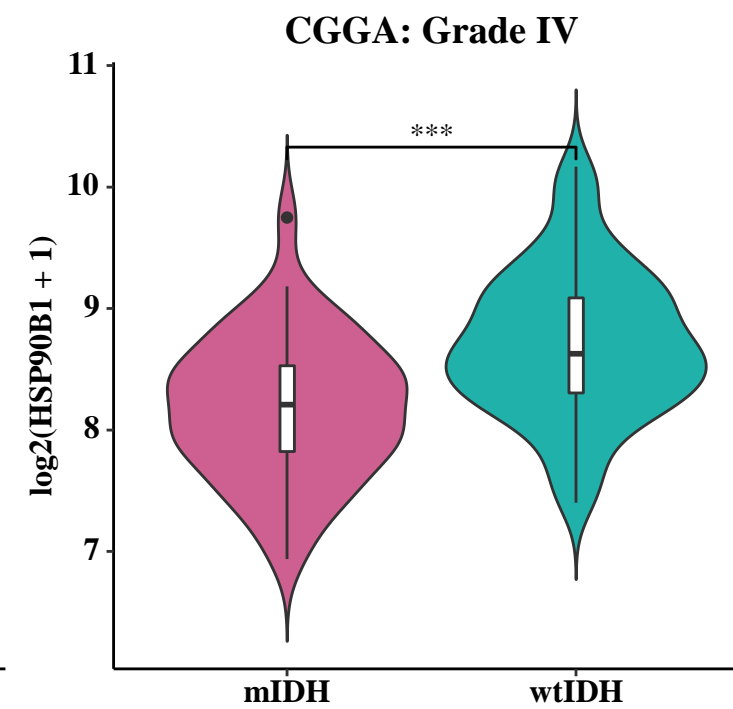

Supplement: f1 [file 9575867.f1.zip]

**A**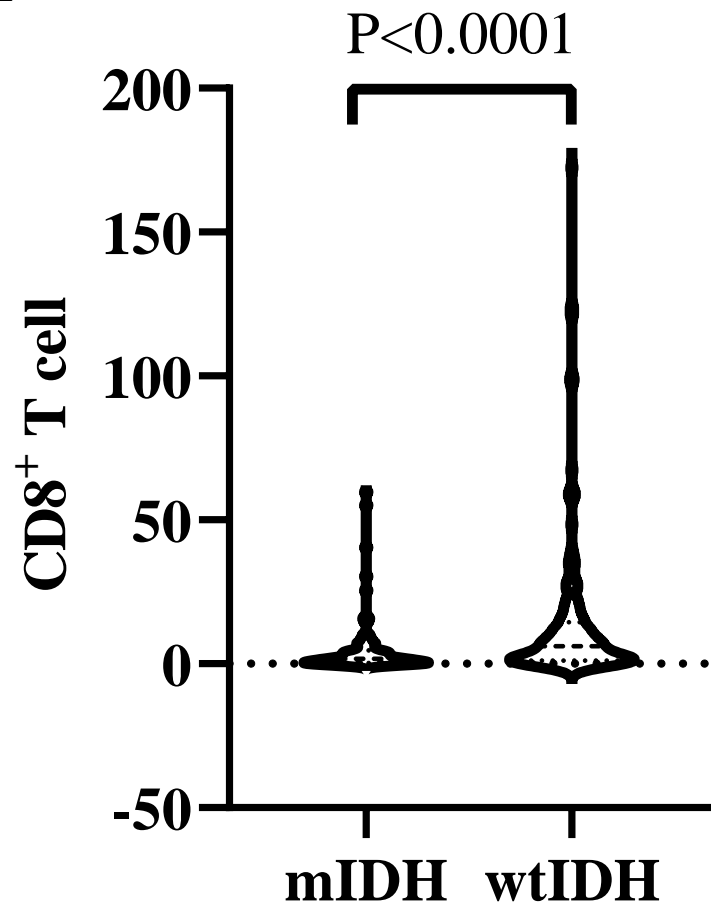**B**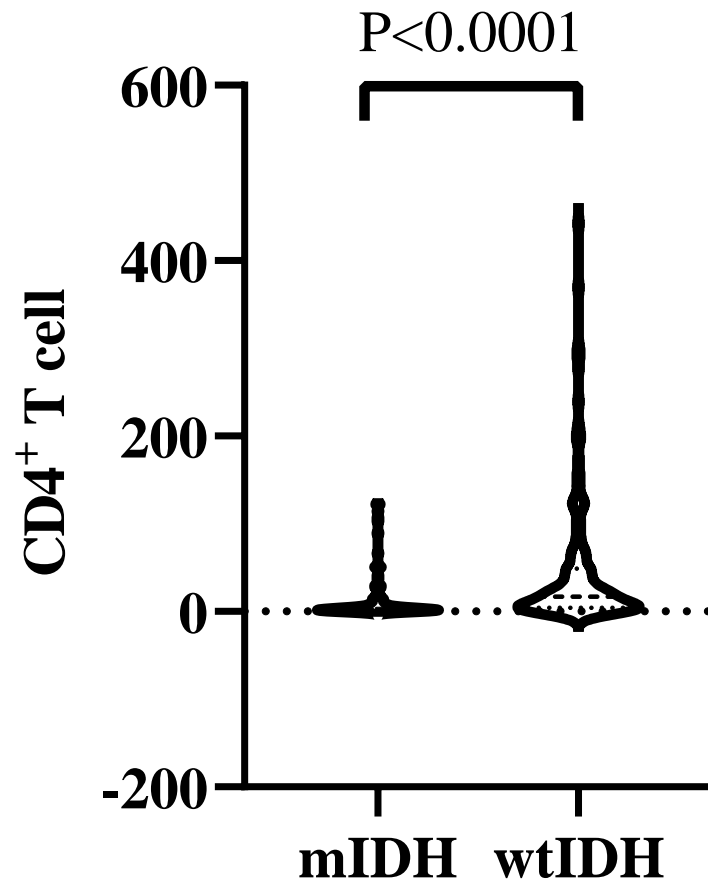

Supplement: f1 [file 9575867.f1.zip]

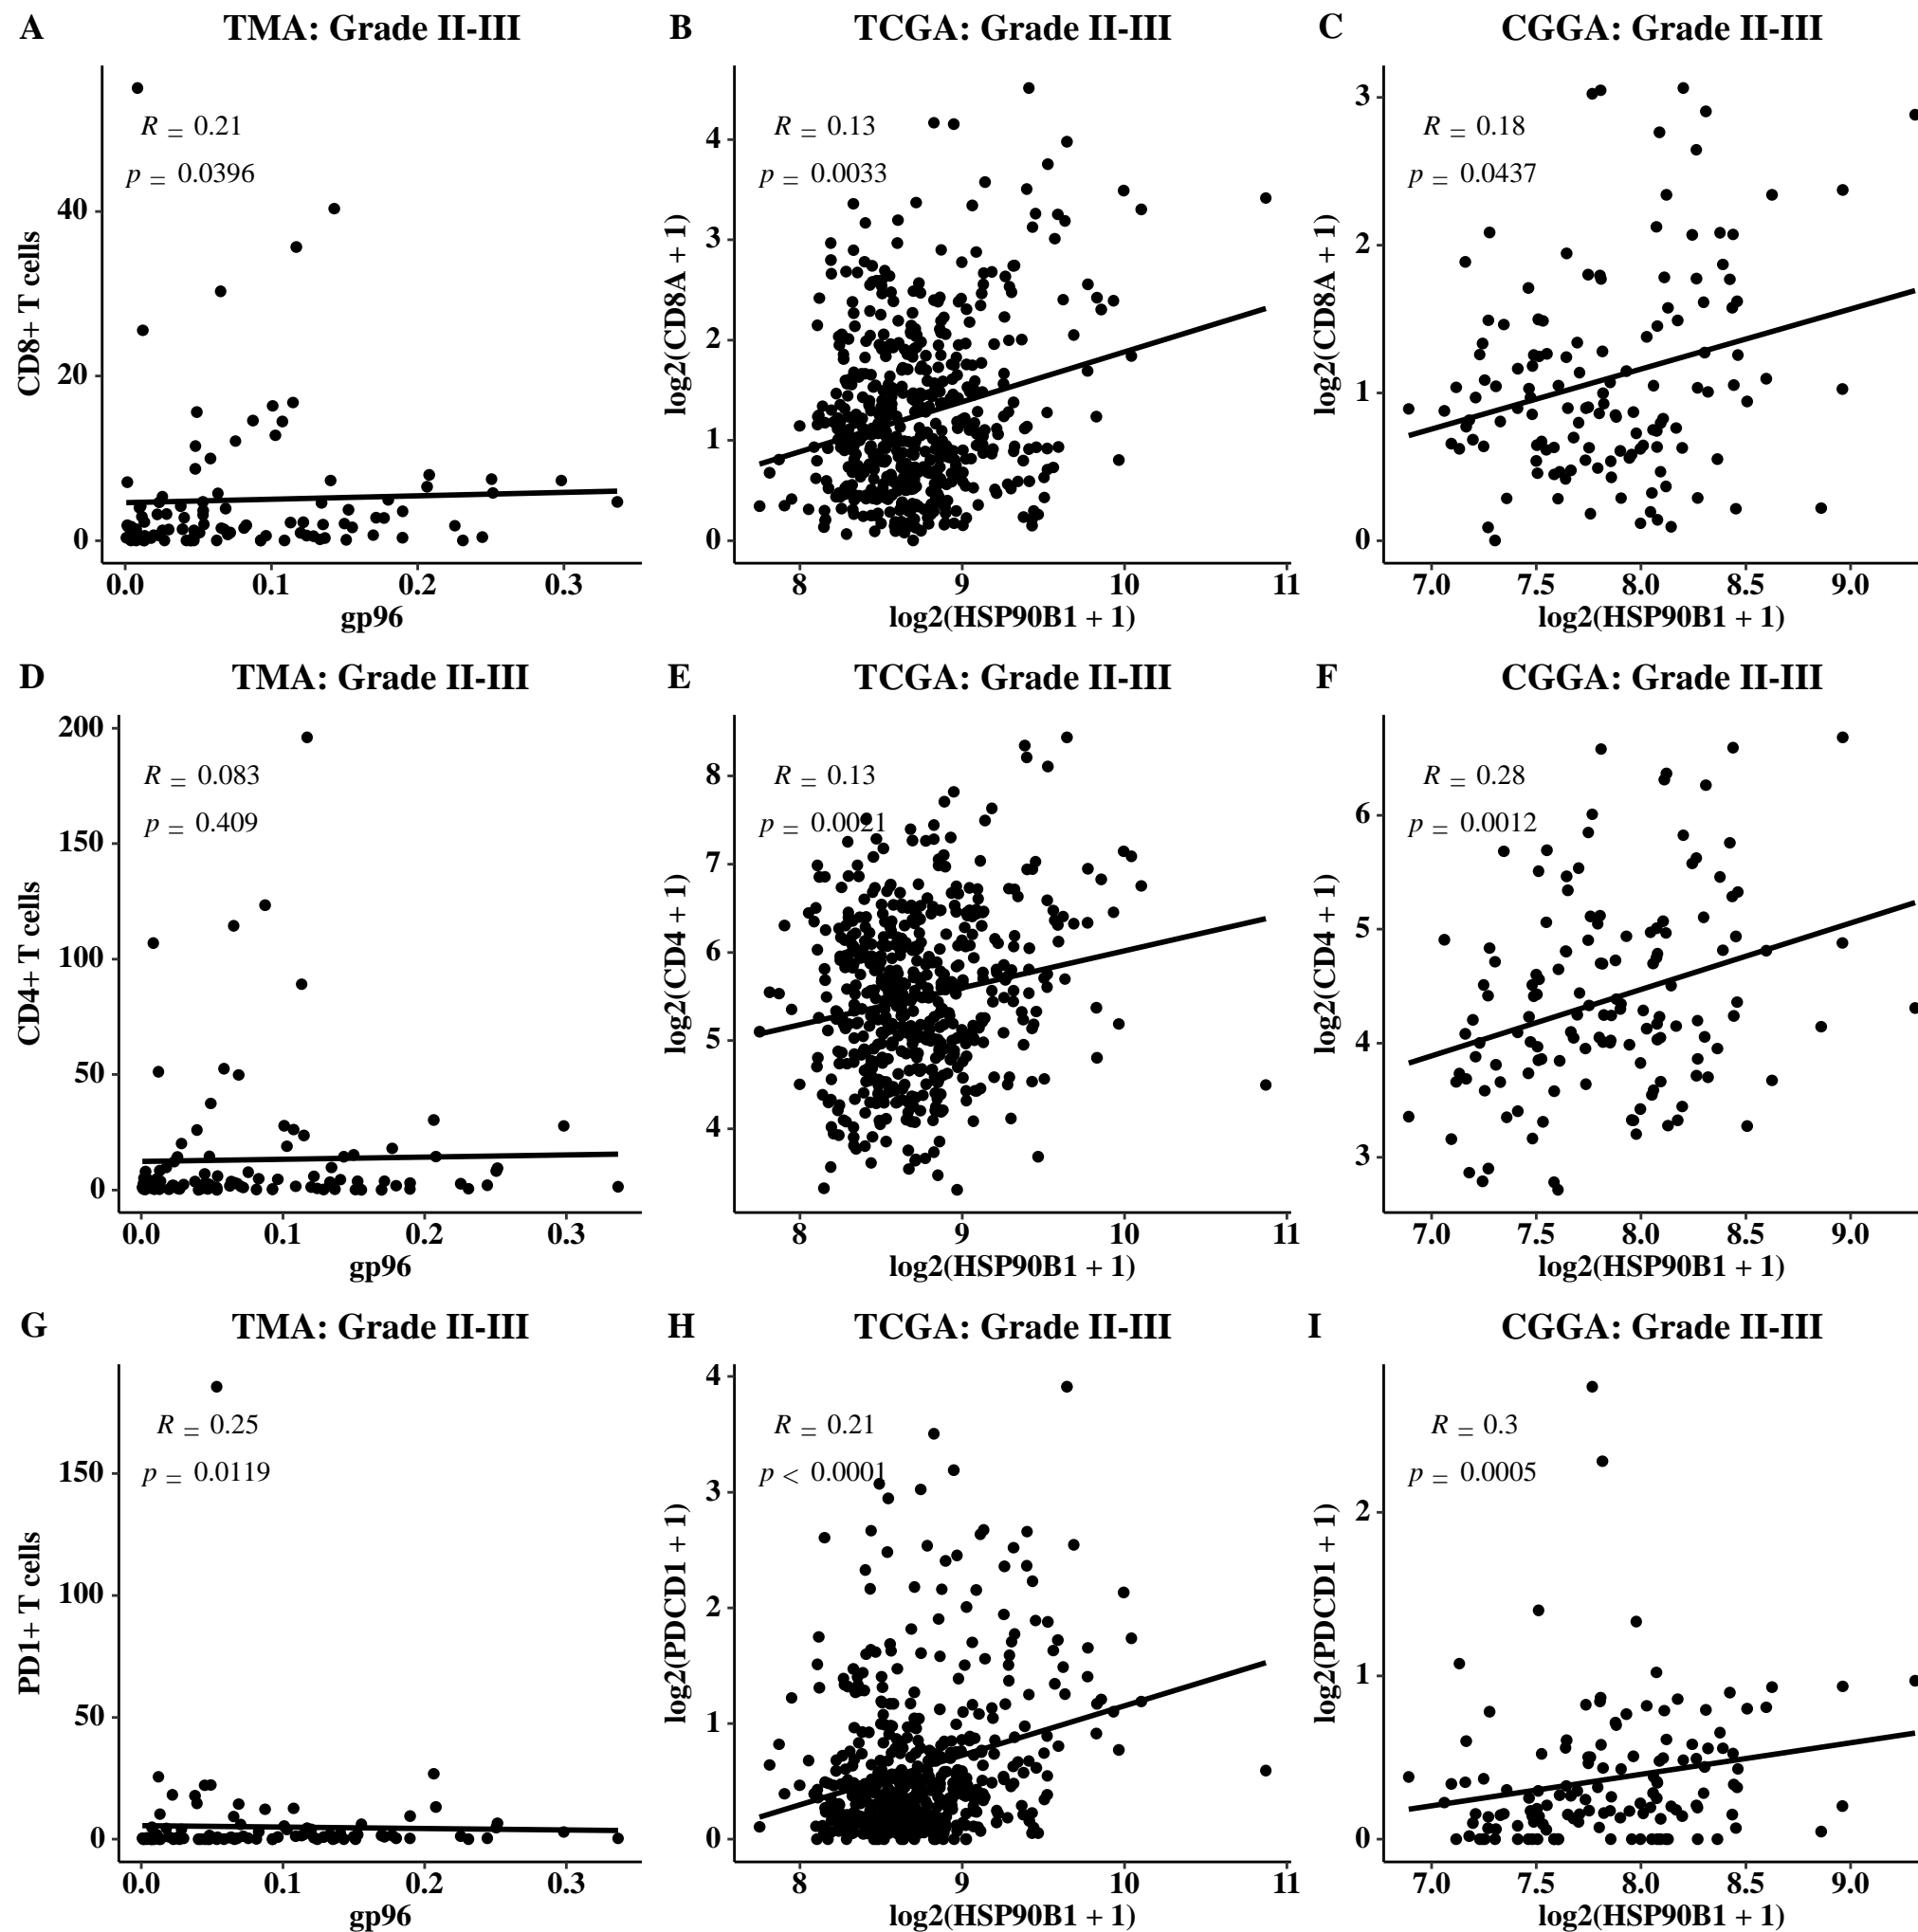

Supplement: f1 [file 9575867.f1.zip]

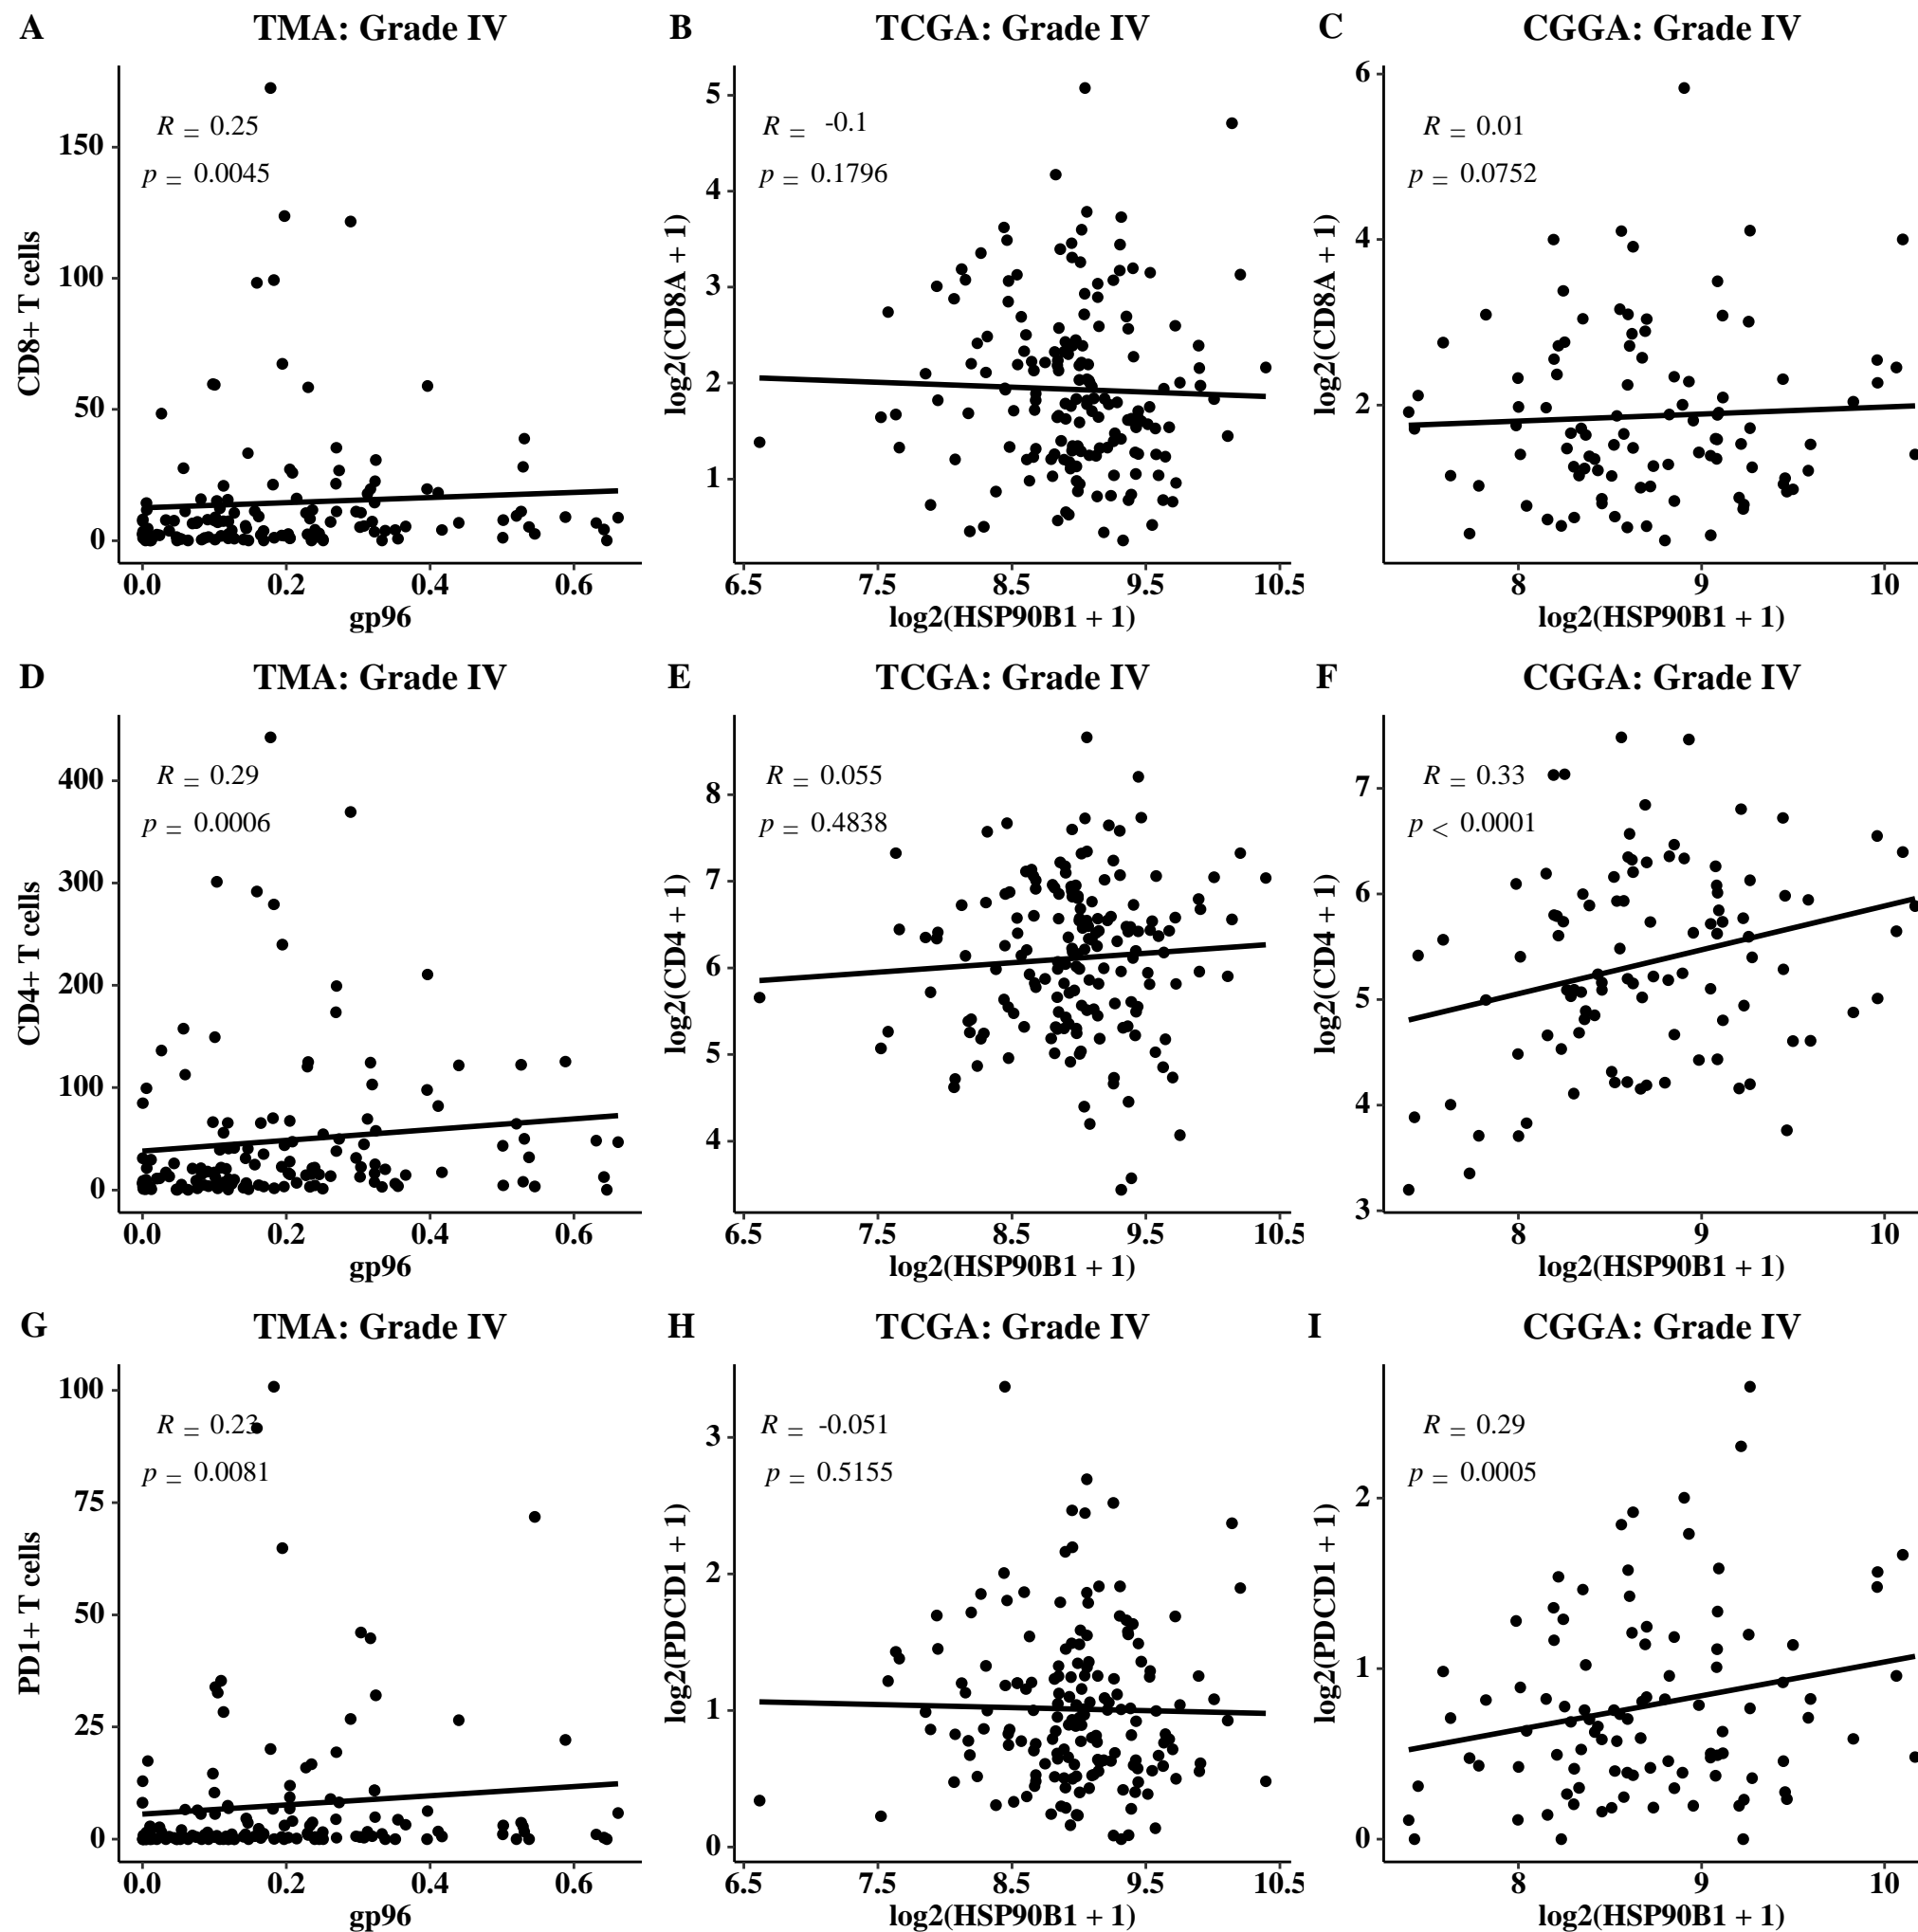

Supplement: f1 [file 9575867.f1.zip]

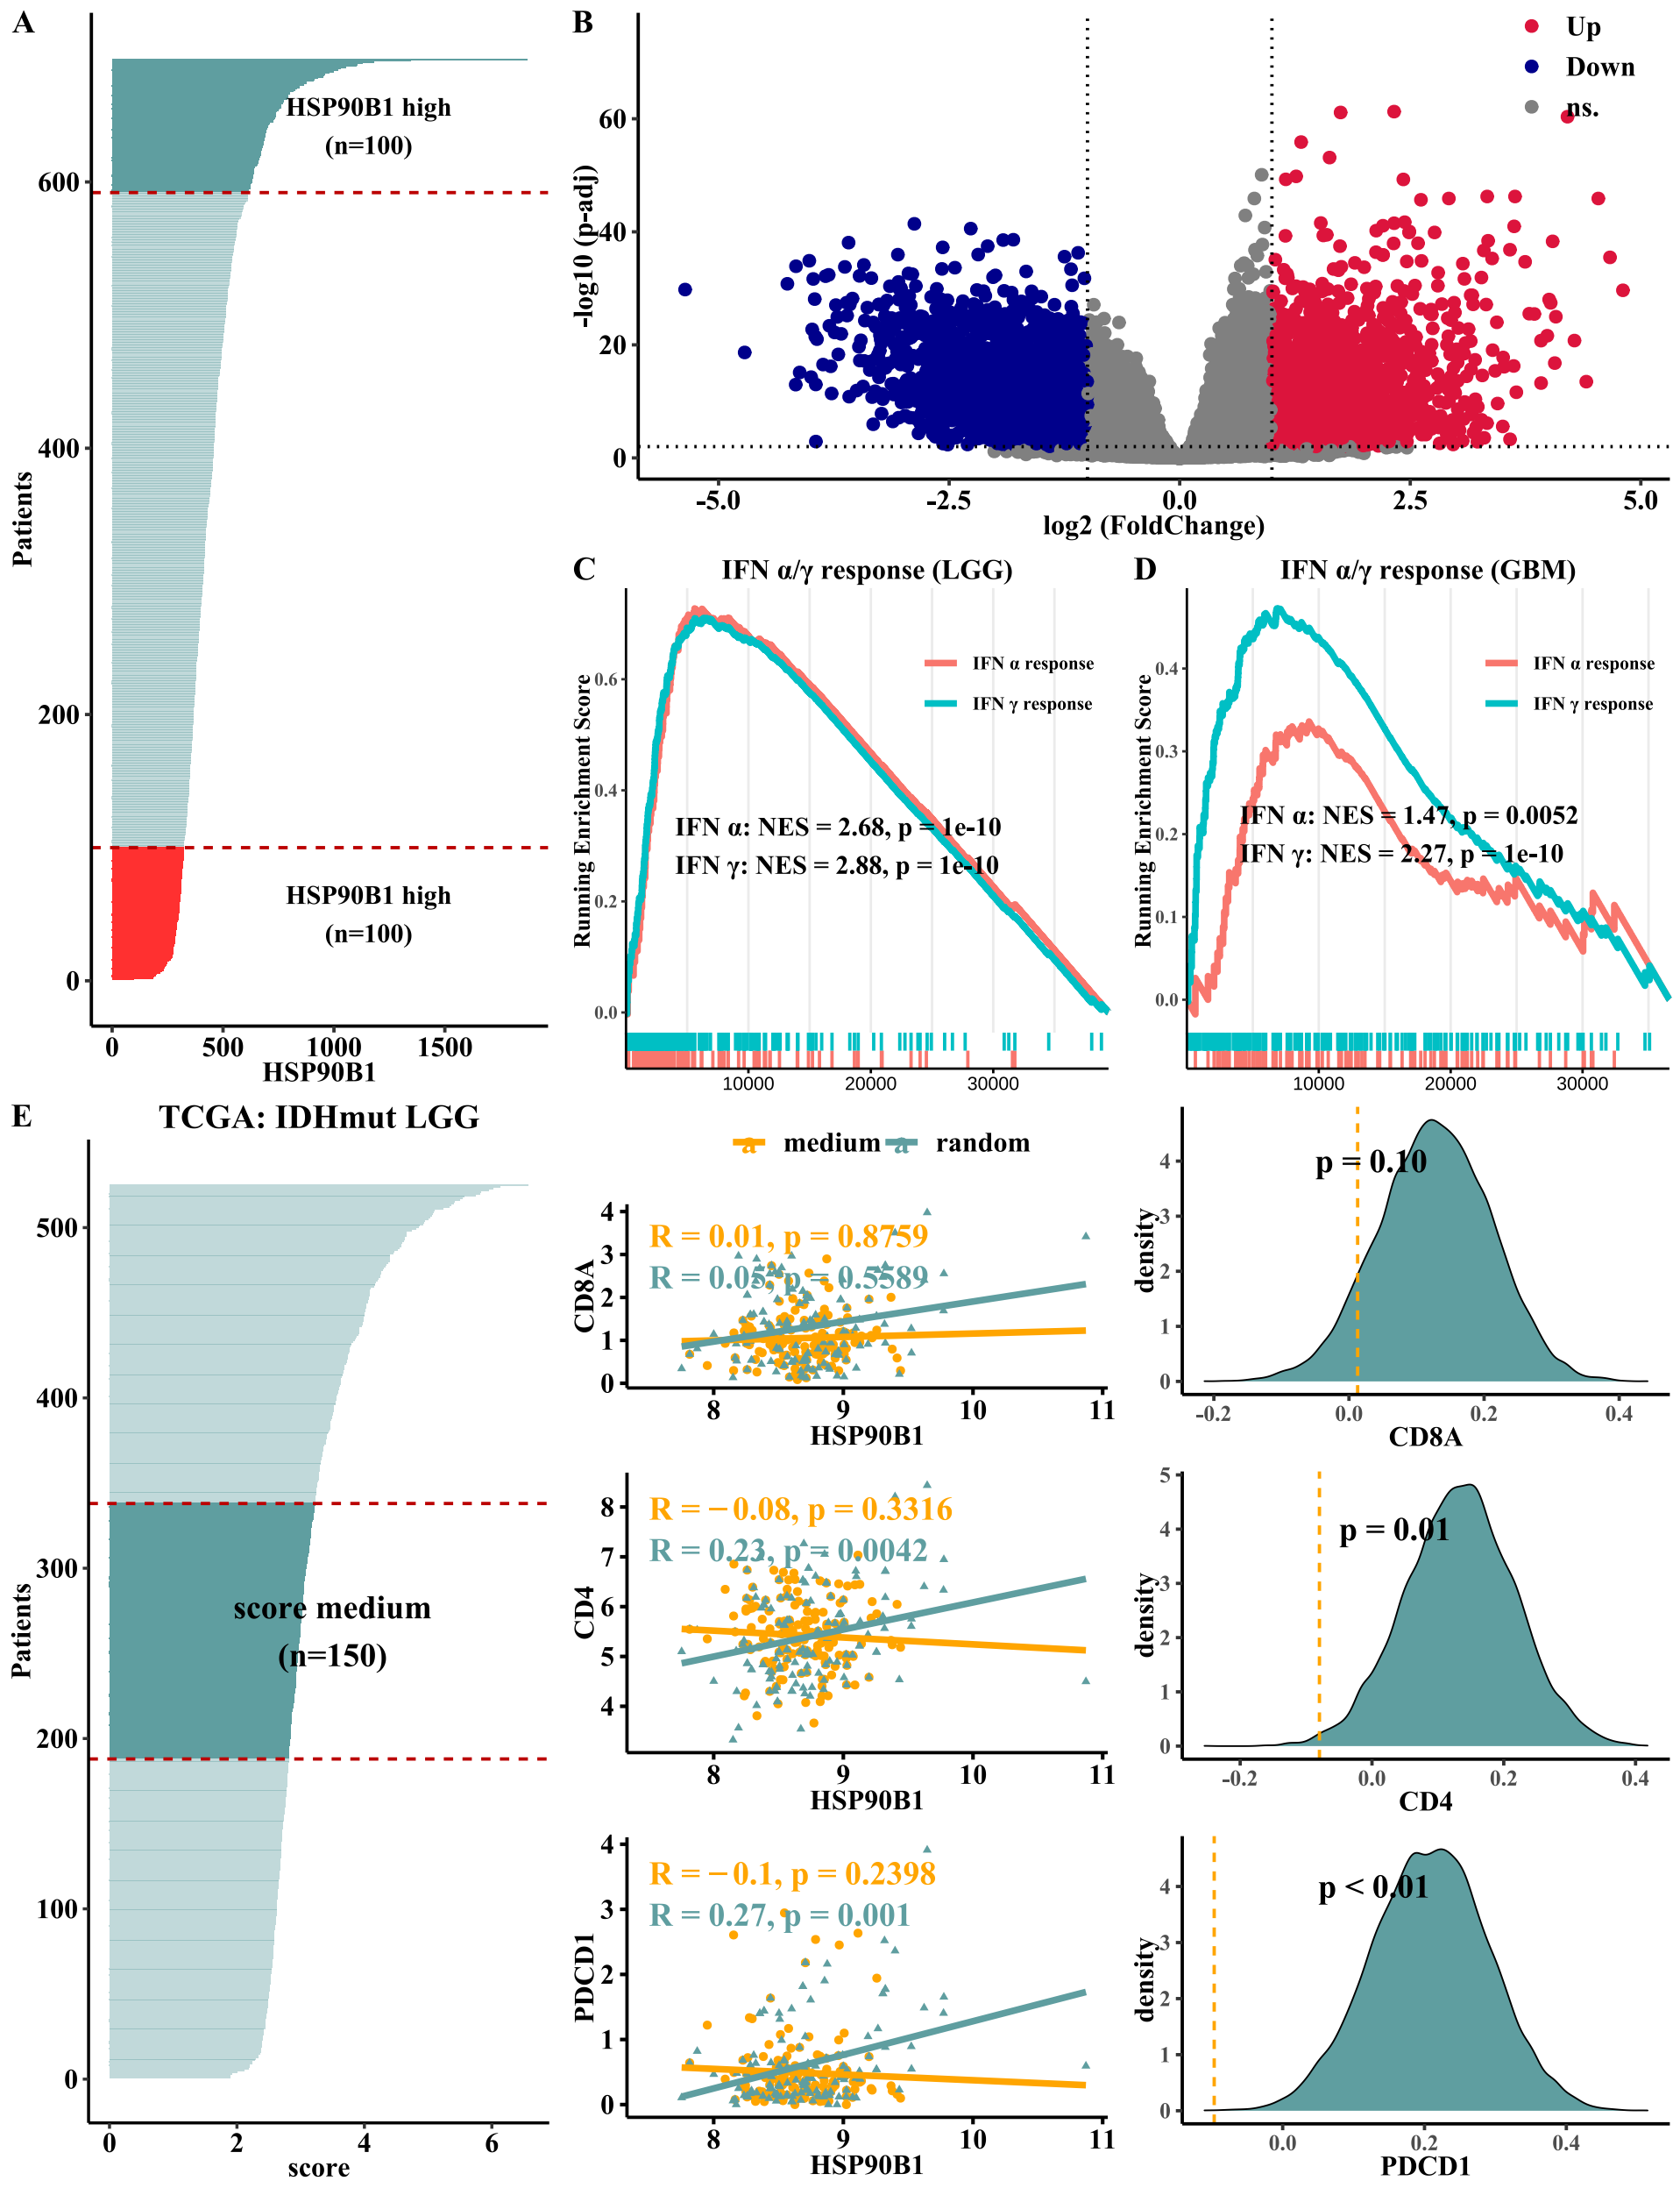

Supplement: f1 [file 9575867.f1.zip]

**A**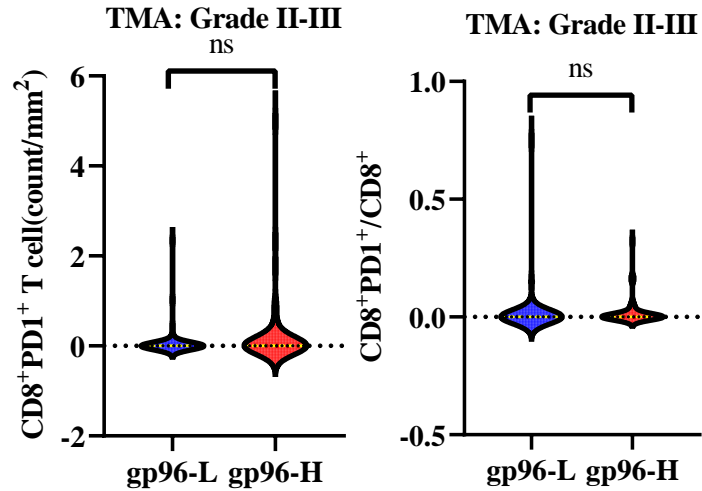**B**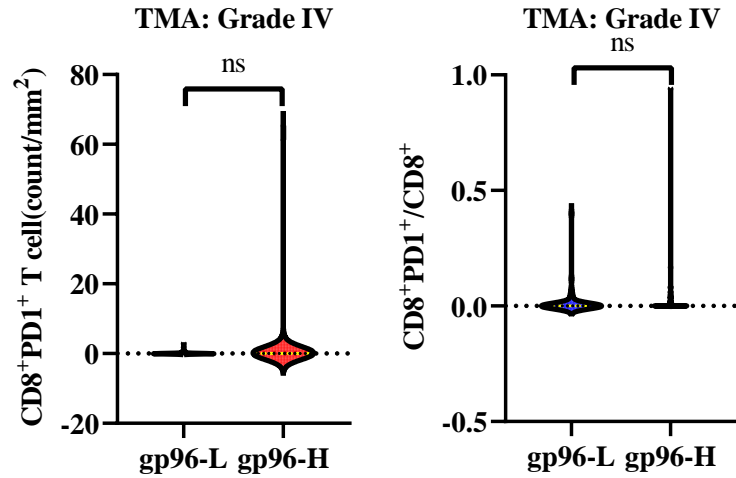

Supplement: f1 [file 9575867.f1.zip]

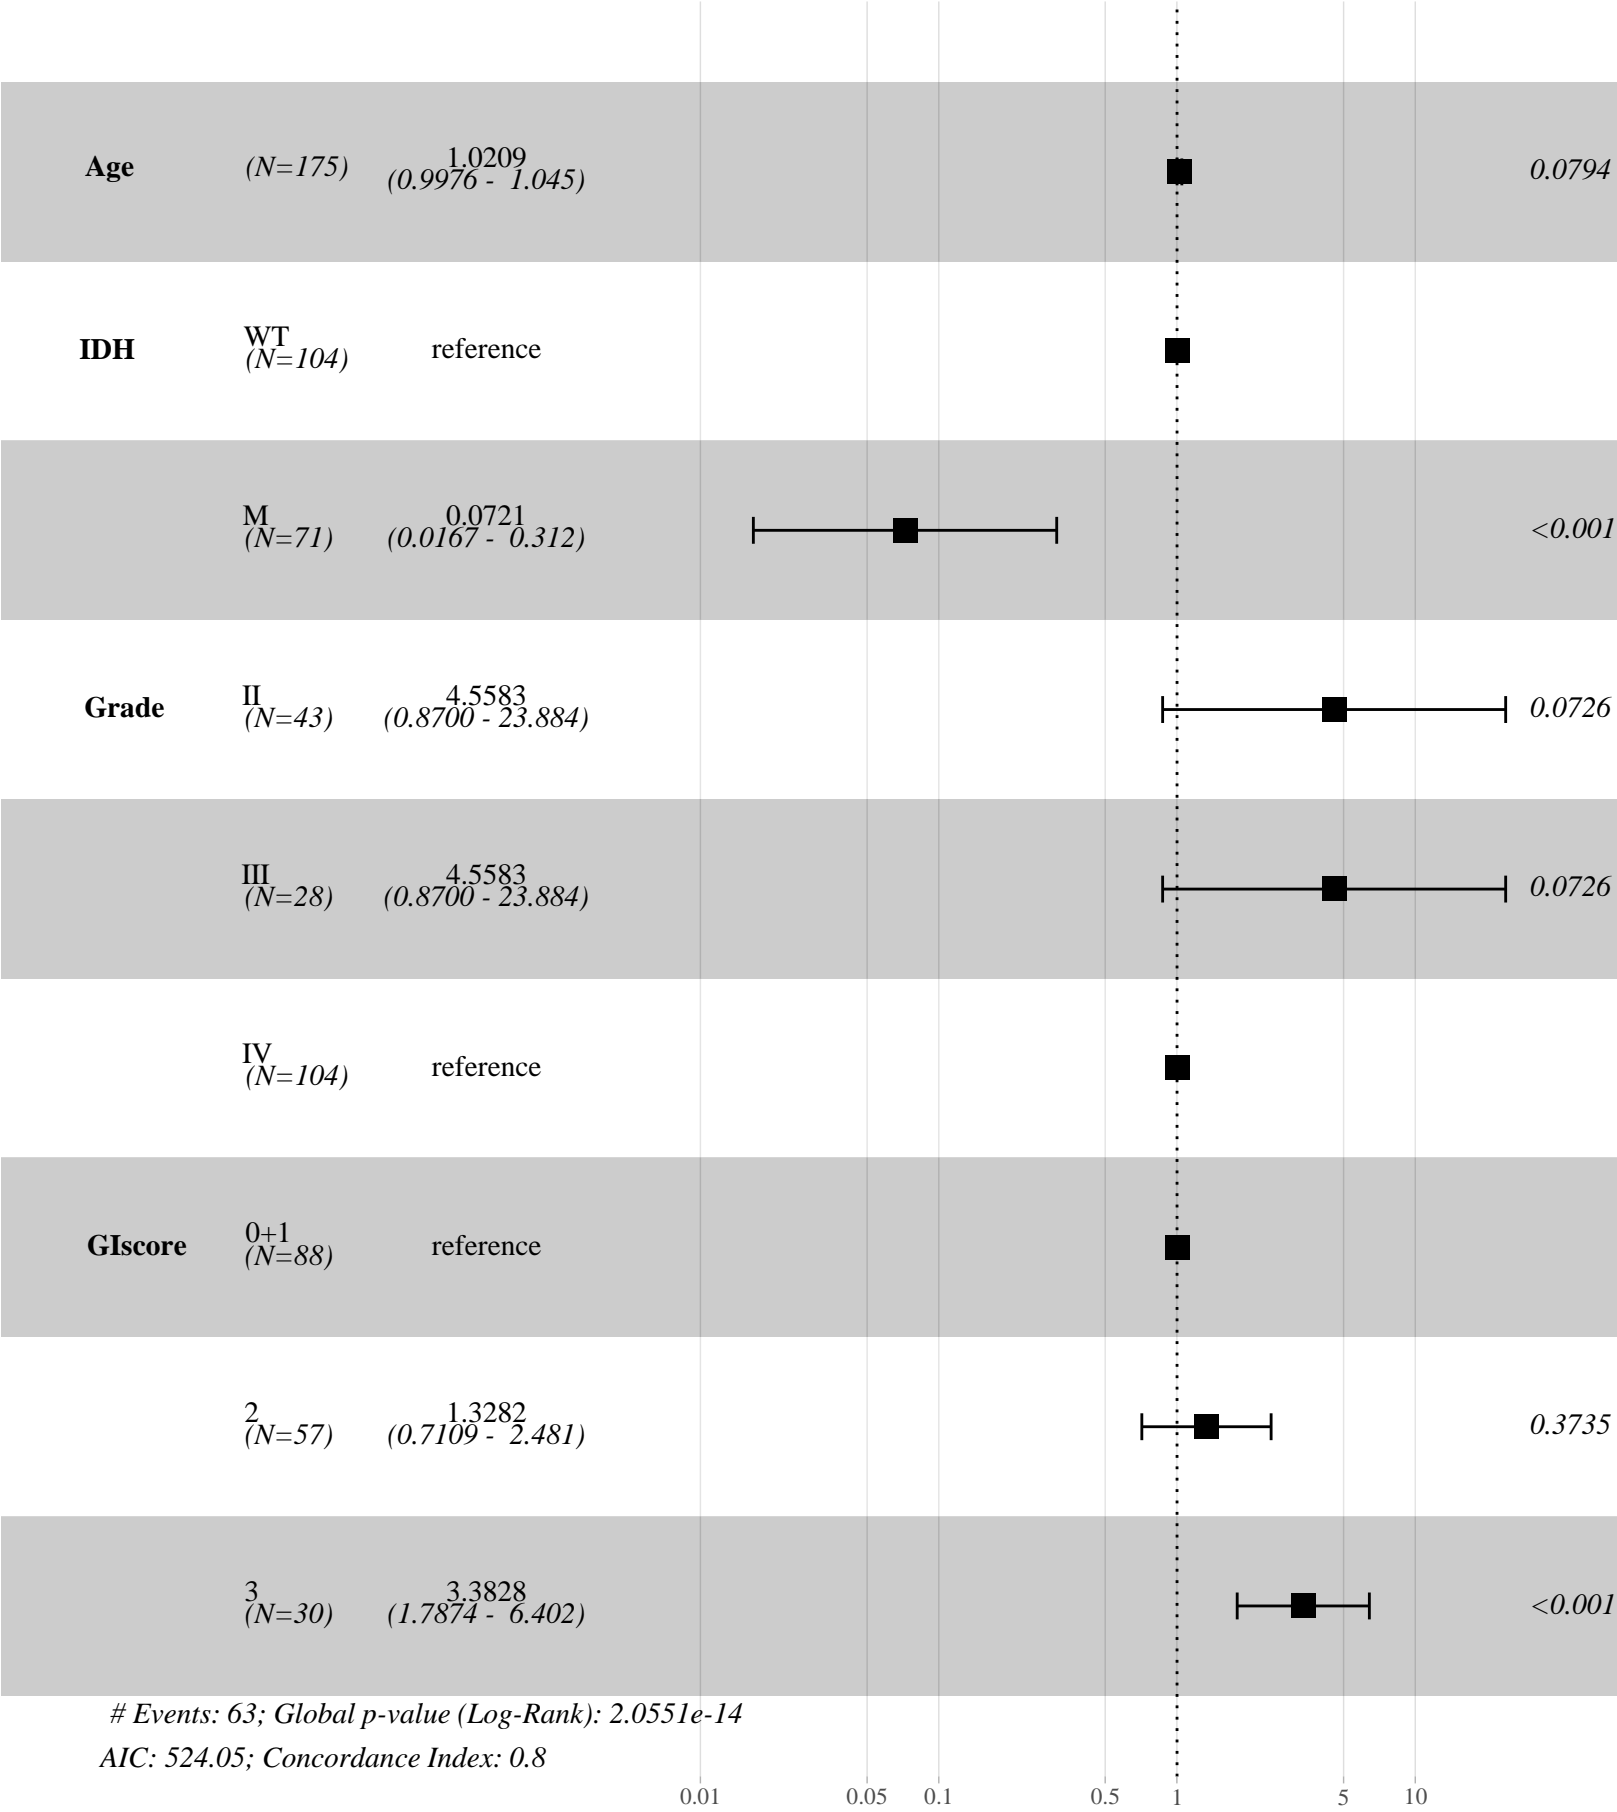

Supplement: f1 [file 9575867.f1.zip]
